# Supplementary material for: Pd–In bimetallic nanoparticles supported on chelating resin for nitrate removal from water: high efficiency and low NH4+ selectivity
Source: Royal Society of Chemistry journal article supplement (doi:10.1039/d1ew00028d), 2021-01-01
Supplement: d1ew00028d1.pdf [file d1ew00028d1.pdf]

## Supplementary Information

Pd-In bimetallic nanoparticles supported on chelating resin for nitrate removal in water:  
high efficiency and low  $\text{NH}_4^+$  selectivity

Zhanhui Shen<sup>a\*</sup>, Gege Peng<sup>a</sup>, Ya Gao<sup>a</sup>, Jialu Shi<sup>a,b\*</sup>

<sup>a</sup> Key Laboratory for Yellow River and Huai River Water Environment and Pollution Control, Ministry of Education, Henan Key Laboratory for Environmental Pollution Control, School of Environment, Henan Normal University, 64 East of Construction Road, Xinxiang 453007, P.R. China.

<sup>b</sup> State Key Laboratory of Pollution Control and Resource Reuse, School of the Environment, Nanjing University, 163 Xianlin Avenue, Nanjing 210046, P.R. China

\* Corresponding author: zhshen@htu.edu.cn (Zhanhui Shen) & shijialu@htu.edu.cn (Jialu Shi)

### Abstract:

Nitrate pollution in ground water and surface water is a worldwide challenge. Reduction of nitrate to nitrogen gas according to electrocatalysis or hydrogenation catalysis is a prospective way to remove nitrate in water. Pd/In bimetallic catalyst supported on chelating resin was prepared by chemical reduction method in aqueous solution. SEM-EDS, TEM, XRD and XPS analysis revealed the Pd/In nanoparticles with a particle size range from 10 nm to 200 nm showed a uniform distribution in the prepared M-Pd/In composites. The prepared M-Pd/In composites showed high nitrate removal efficiency (96%) and low  $\text{NH}_4^+$  selectivity (<2%) when the initial concentration of  $\text{NO}_3^-$ -N was 100 mg N/L. The coexisting anion, organic matter and initial pH value showed little influence on the nitrate removal ability of the prepared M-Pd/In composites.  $\text{H}_{\text{ads}}$  and  $\text{NaBH}_4$  could be stored during the preparing process of the Pd/In bimetallic composites, which acted as reducing reagent in the nitrate removal process. The prepared M-Pd/In composites showed good nitrate removal ability after recycling 5 times. When it was used to treat actual wastewater, nearly all of the nitrate, nitrite and ammonium was removed from municipal WWTP effluent.

Keywords: Palladium; Indium; Bimetallic nanoparticle; Catalysis; Nitrate

Table S1. Metal precursor solution for preparing Pd/In bimetallic nanoparticles on M4195 resin

| Sample mark    | Solution bulk<br>(mL) | PdCl <sub>2</sub><br>(g) | InCl <sub>3</sub> •4H <sub>2</sub> O<br>(g) | Pd/In<br>mole ratio |
|----------------|-----------------------|--------------------------|---------------------------------------------|---------------------|
| M-Pd           | 50                    | 0.2226                   |                                             |                     |
| M-In           | 50                    |                          | 0.3665                                      |                     |
| M-Pd/In(1/1)   | 50                    | 0.2226                   | 0.3665                                      | 1/1                 |
| M-Pd/In(1/0.5) | 50                    | 0.2226                   | 0.1832                                      | 1/0.5               |
| M-Pd/In(0.5/1) | 50                    | 0.1113                   | 0.3665                                      | 0.5/1               |

Table S2 Pd/In mass loaded on 0.5 g DOW M4195 Resin in the prepared bimetallic composites

|                | Pd (mg) | In (mg) | Pd/In mass ratio | Pd + In (mg) |
|----------------|---------|---------|------------------|--------------|
| M-Pd/In(1/1)   | 64.8    | 23.9    | 2.7/1            | 88.7         |
| M-Pd/In(1/0.5) | 63.9    | 12.7    | 5.0/1            | 76.6         |
| M-Pd/In(0.5/1) | 45.2    | 28.6    | 1.6/1            | 73.8         |

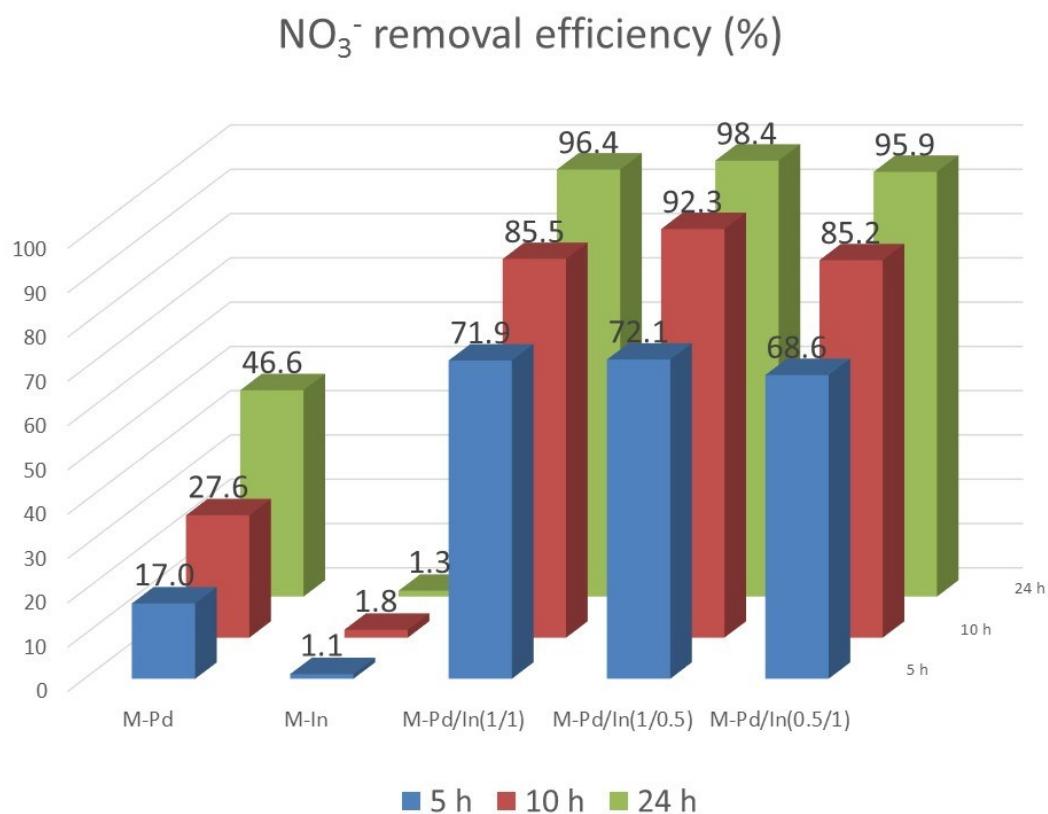

Fig. S1 The  $\text{NO}_3^-$  removal efficiency of the prepared Pd/In bimetallic composites after 5h, 10h and 24h of reaction

Table S3. Fitting results of the pseudo-first-order kinetic model for the three Pd/In bimetallic composites

|                  | M-Pd/In(1/1) | M-Pd/In(1/0.5) | M-Pd/In(0.5/1) |
|------------------|--------------|----------------|----------------|
| $k_{\text{obs}}$ | 0.230        | 0.232          | 0.214          |
| $R^2$            | 0.907        | 0.900          | 0.901          |

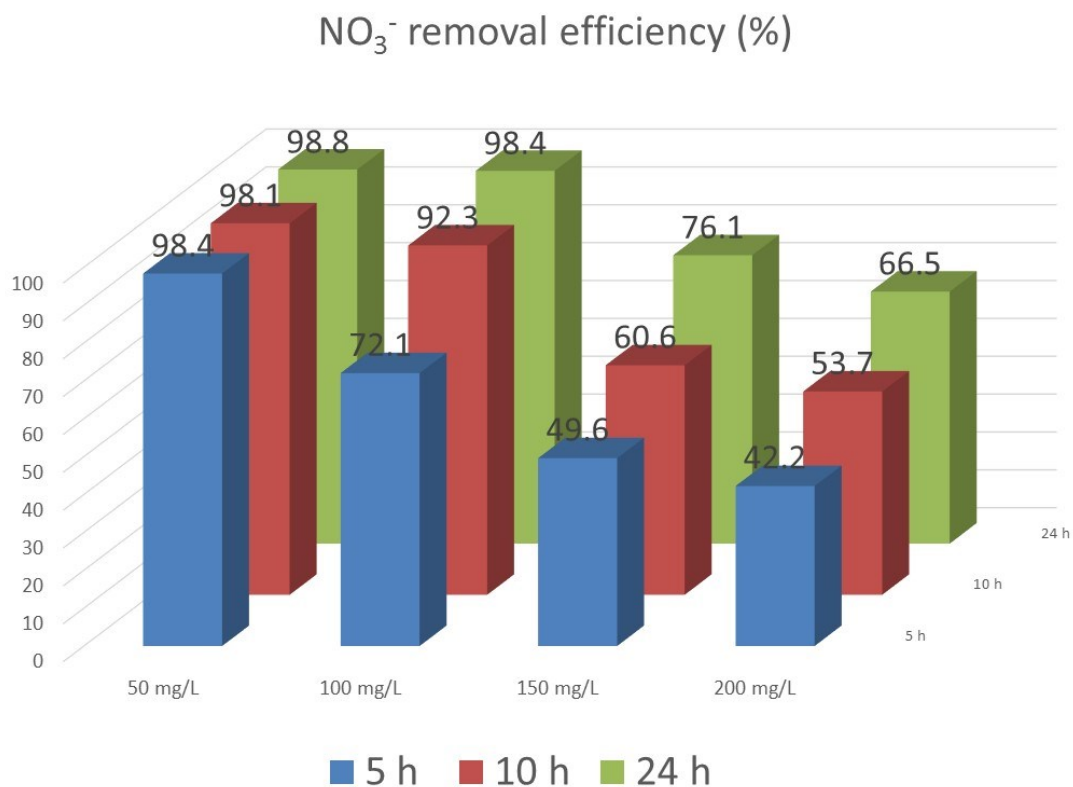

Fig. S2 The  $\text{NO}_3^-$  removal efficiency of M-Pd/In(1/0.5) at the 5<sup>th</sup> hour, the 10<sup>th</sup> hour and the 24<sup>th</sup> hour at the condition of different initial  $\text{NO}_3^-$ -N concentration

Table S4. Fitting results of the pseudo-first-order kinetic model for nitrate removal process at different initial  $\text{NO}_3^-$ -N concentration

|                  | 50 mg/L | 100 mg/L | 150 mg/L | 200 mg/L |
|------------------|---------|----------|----------|----------|
| $k_{\text{obs}}$ | 0.807   | 0.232    | 0.125    | 0.095    |
| $R^2$            | 0.987   | 0.900    | 0.797    | 0.786    |

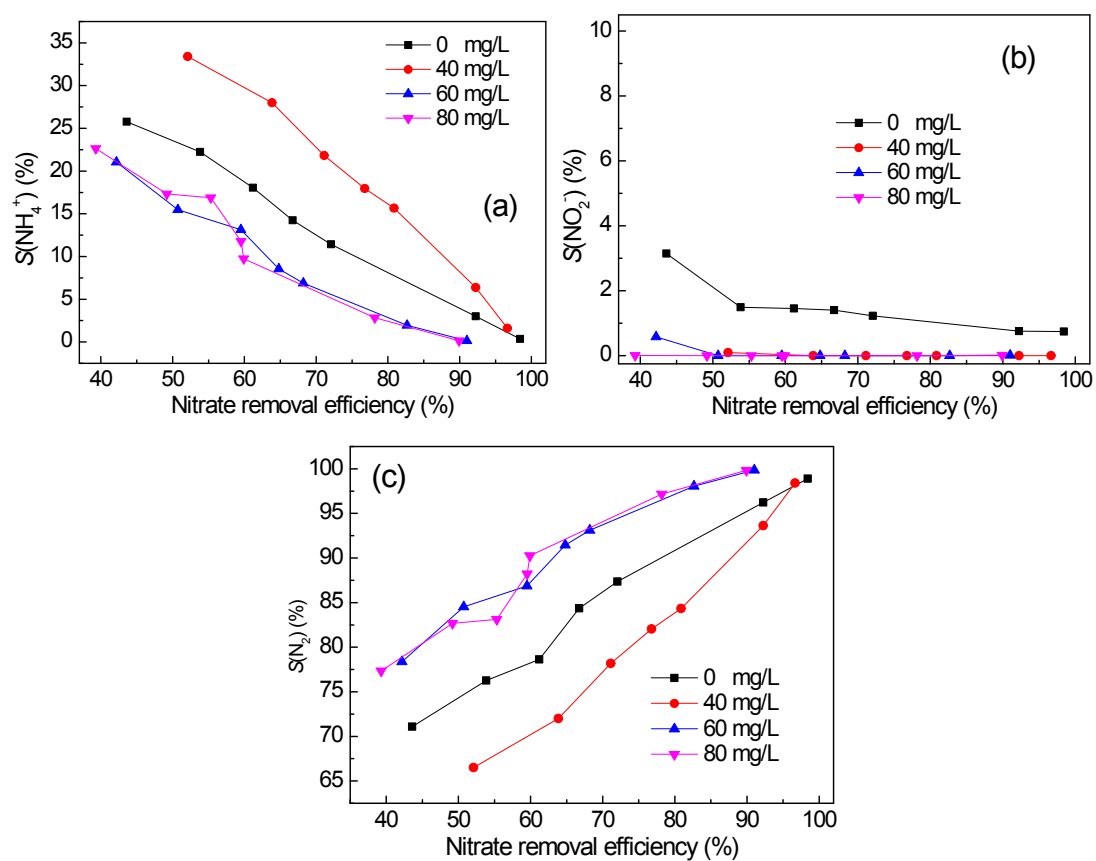

Fig. S3 Product selectivity as a function of nitrate removal efficiency at different concentration of  $\text{HCO}_3^-$ : (a)  $\text{NH}_4^+-\text{N}$ ; (b)  $\text{NO}_2^--\text{N}$ ; (c)  $\text{N}_2$

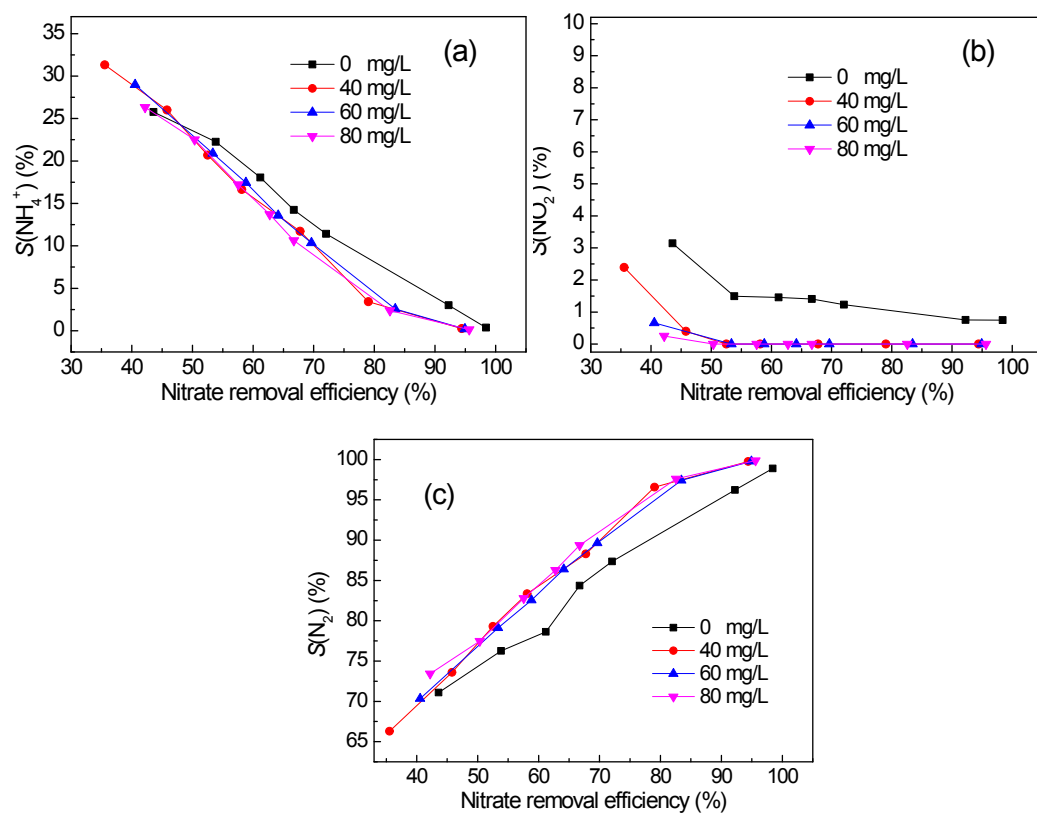

Fig. S4 Product selectivity as a function of nitrate removal efficiency at different concentration of  $\text{Cl}^-$ : (a)  $\text{NH}_4^+\text{-N}$ ; (b)  $\text{NO}_2^-\text{-N}$ ; (c)  $\text{N}_2$

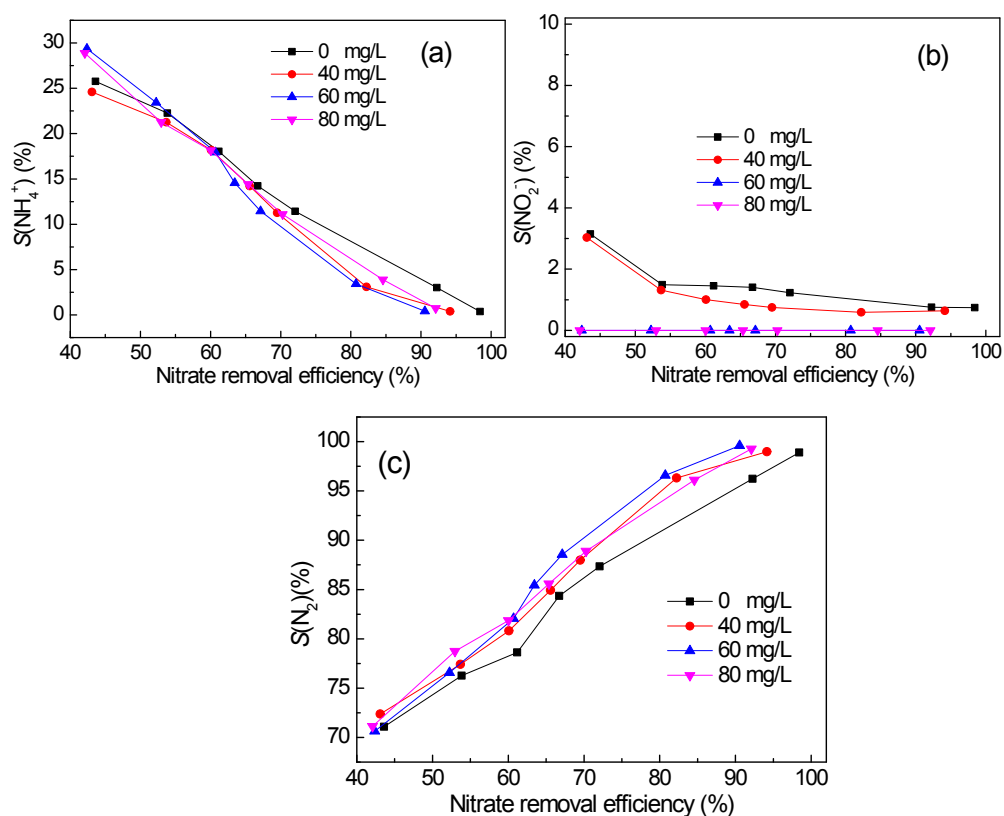

Fig. S5 Product selectivity as a function of nitrate removal efficiency at different concentration of  $\text{SO}_4^{2-}$ : (a)  $\text{NH}_4^+$ -N; (b)  $\text{NO}_2^-$ -N; (c)  $\text{N}_2$

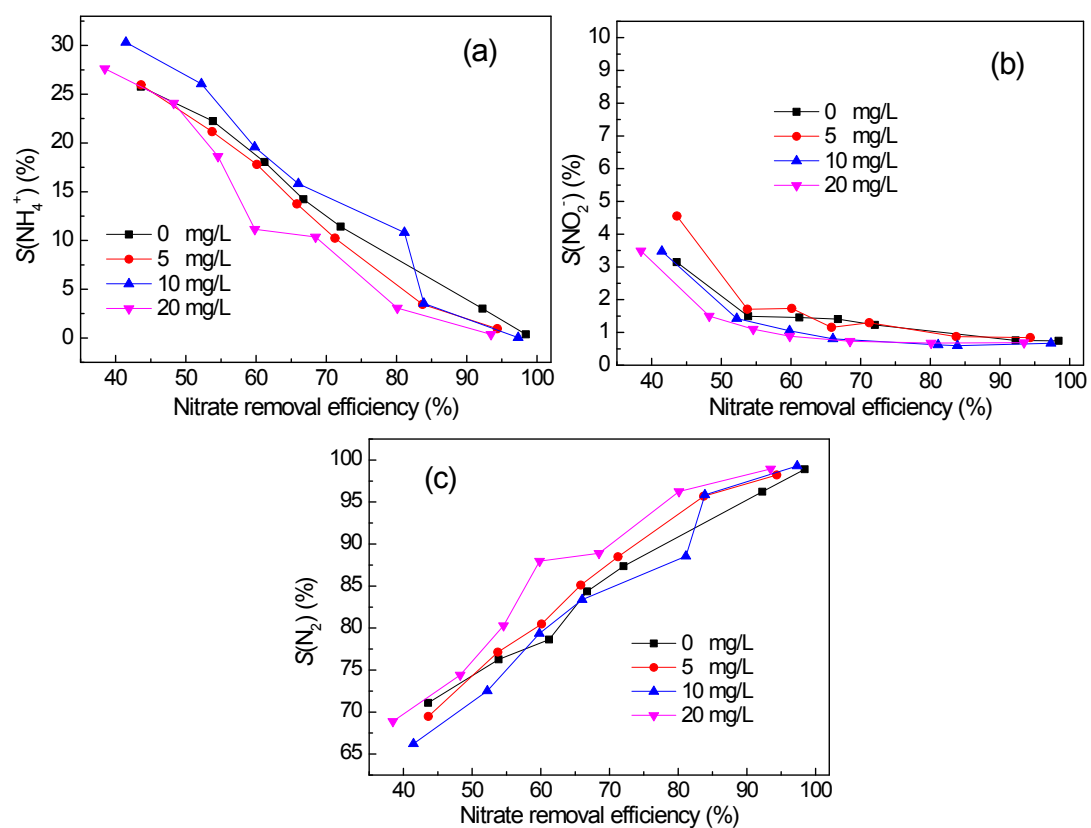

Fig. S6 Product selectivity as a function of nitrate removal efficiency at different concentration of humic acid: (a)  $\text{NH}_4^+\text{-N}$ ; (b)  $\text{NO}_2^-\text{-N}$ ; (c)  $\text{N}_2$

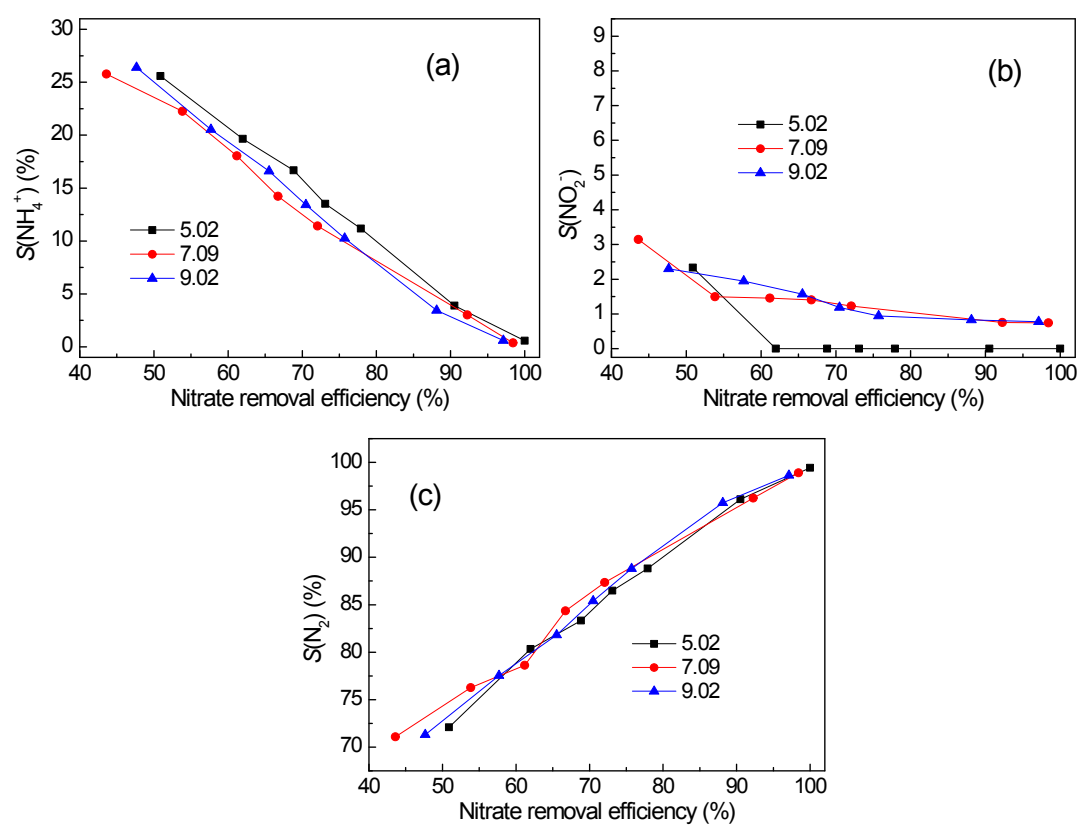

Fig. S7 Product selectivity as a function of nitrate removal efficiency at different initial pH: (a)  $\text{NH}_4^+$ -N; (b)  $\text{NO}_2^-$ -N; (c)  $\text{N}_2$

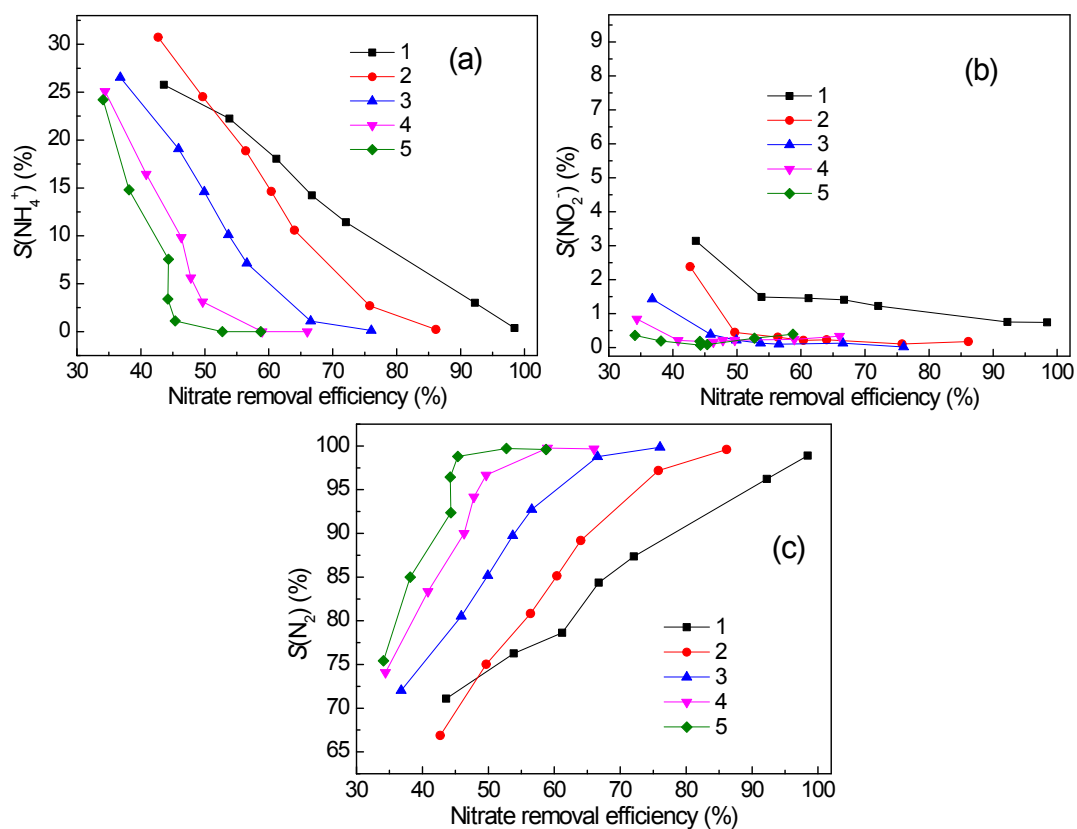

Fig. S8 Product selectivity as a function of nitrate removal efficiency at different recycling nitrate removal reaction (1 to 5): (a)  $\text{NH}_4^+\text{-N}$ ; (b)  $\text{NO}_2^-\text{-N}$ ; (c)  $\text{N}_2$

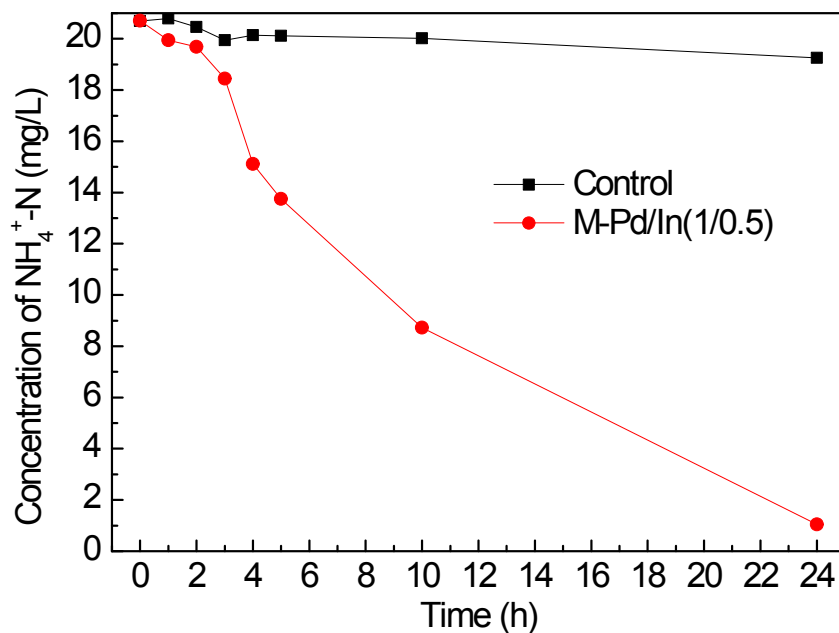

Fig. S9 The concentration of  $\text{NH}_4^+\text{-N}$  in the presence of M-Pd/In(1/0.5) and the control at the initial pH of 9.50

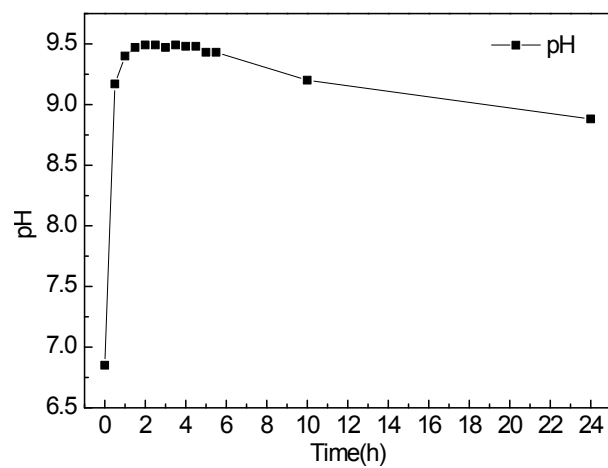

Fig. S10 The pH value during the nitrate removal reaction by M-Pd/In(1/0.5)

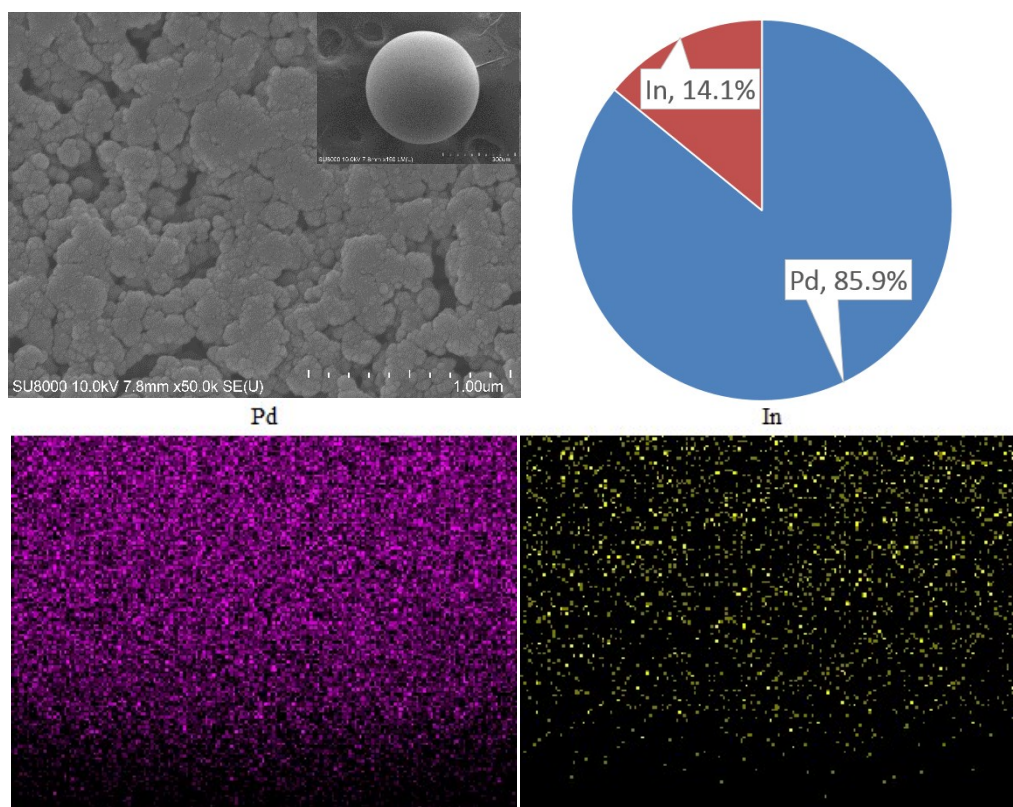

Fig. S11 FESEM-EDS results of M-Pd/In(1/0.5) after 5 cycles of reuse

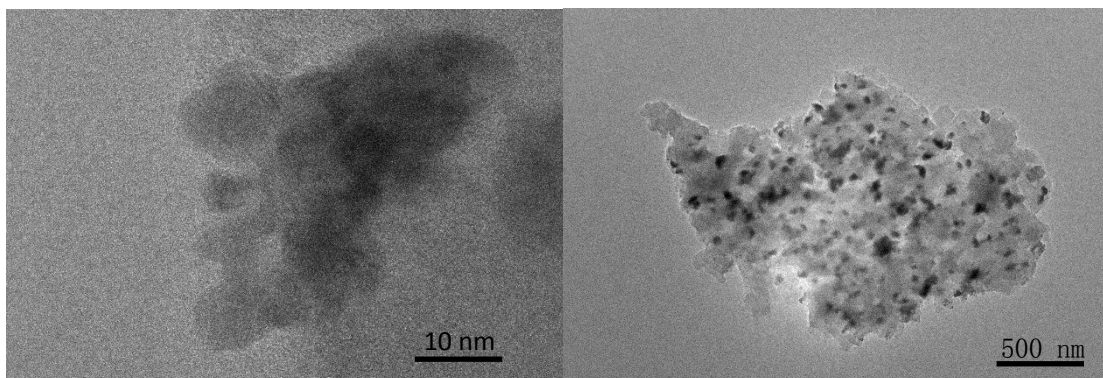

Fig. S12 TEM images of M-Pd/In(1/0.5) after 5 cycles of reuse

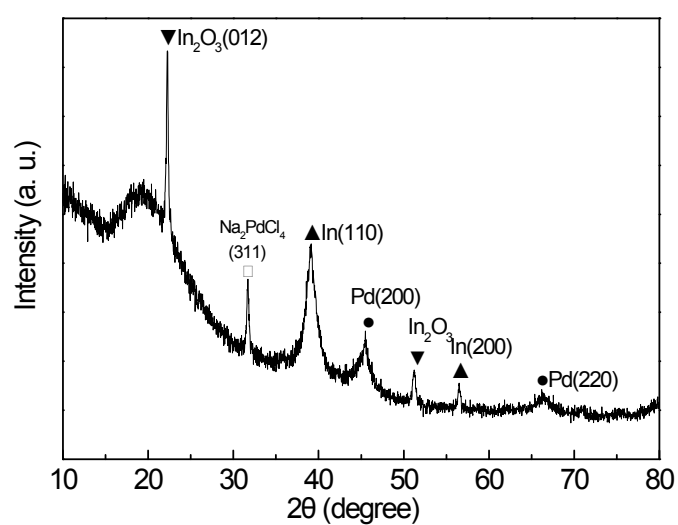

Fig. S13 XRD spectrum of M-Pd/In(1/0.5) after 5 cycles of reuse

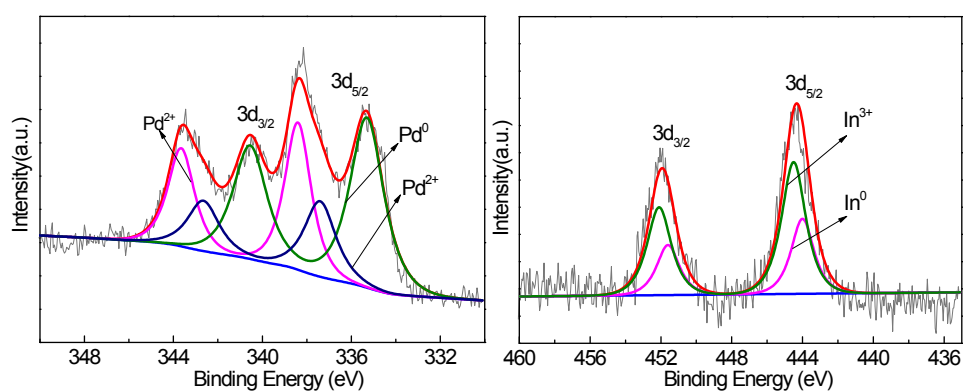

Fig. S14 XPS results of the prepared M-Pd/In composite after 5 cycles of reuse: (a) Pd and (b) In

Table S5. Characteristic of Influent and Effluent of Xiaoshangzhuang Municipal

| Wastewater Treatment Plant      |          |          |        |          |
|---------------------------------|----------|----------|--------|----------|
|                                 | Influent | Effluent | Limits | Units    |
| pH                              | 7.7      | 7.42     | 6-9    | 1        |
| BOD                             | 181      | 5.6      | 10     | mg/L     |
| TP                              | 1.9      | 0.29     | 0.5    | mg/L     |
| COD                             | 489      | 23       | 50     | mg/L     |
| Volatile phenol                 | 0.0067   | 0.0023   | 0.5    | mg/L     |
| Chromaticity                    | 32       | 8        | 30     | multiple |
| Hg                              | <0.00004 | <0.00004 | 0.001  | mg/L     |
| Cd                              | 0.071    | <0.004   | 0.01   | mg/L     |
| Cr                              | 0.404    | <0.004   | 0.1    | mg/L     |
| Cr (VI)                         | <0.004   | <0.004   | 0.05   | mg/L     |
| As                              | 0.0047   | 0.0029   | 0.1    | mg/L     |
| Pb                              | 0.024    | <0.02    | 0.1    | mg/L     |
| SS                              | 394      | 10       | 10     | mg/L     |
| LAS                             | 1.19     | 0.129    | 0.5    | mg/L     |
| Fecal coliform                  | 24000    | 3500     | 1000   | 1/L      |
| NH <sub>4</sub> <sup>+</sup> -N | 24.6     | 0.092    | 5      | mg/L     |
| TN                              | 29.9     | 5.75     | 15     | mg/L     |

The Effluent meets the limits of one-class A of Municipal Wastewater Treatment Plant Pollutant Discharge Standard (GB 18918-2002).

Table S6. Characteristic of Influent and Effluent of Luotuowan Municipal Wastewater

|                                 | Treatment Plant |          |        |          |
|---------------------------------|-----------------|----------|--------|----------|
|                                 | Influent        | Effluent | Limits | Units    |
| pH                              | 7.72            | 7.41     | 6-9    | 1        |
| BOD                             | 65.5            | 3.3      | 10     | mg/L     |
| TP                              | 2.34            | 0.38     | 0.5    | mg/L     |
| COD                             | 177             | 18       | 50     | mg/L     |
| Volatile phenol                 | 0.0076          | 0.0023   | 0.5    | mg/L     |
| Chromaticity                    | 32              | 8        | 30     | multiple |
| Hg                              | <0.00004        | <0.00004 | 0.001  | mg/L     |
| Cd                              | 0.071           | <0.004   | 0.01   | mg/L     |
| Cr                              | 0.404           | <0.004   | 0.1    | mg/L     |
| Cr (VI)                         | <0.004          | <0.004   | 0.05   | mg/L     |
| As                              | 0.0032          | 0.0022   | 0.1    | mg/L     |
| Pb                              | <0.02           | <0.02    | 0.1    | mg/L     |
| SS                              | 135             | 7        | 10     | mg/L     |
| LAS                             | 0.724           | 0.334    | 0.5    | mg/L     |
| Fecal coliform                  | 24000           | 3500     | 1000   | 1/L      |
| NH <sub>4</sub> <sup>+</sup> -N | 28.8            | 0.293    | 5      | mg/L     |
| TN                              | 35.1            | 14.7     | 15     | mg/L     |

The Effluent meets the limits of one-class A of Municipal Wastewater Treatment Plant Pollutant Discharge Standard (GB 18918-2002).

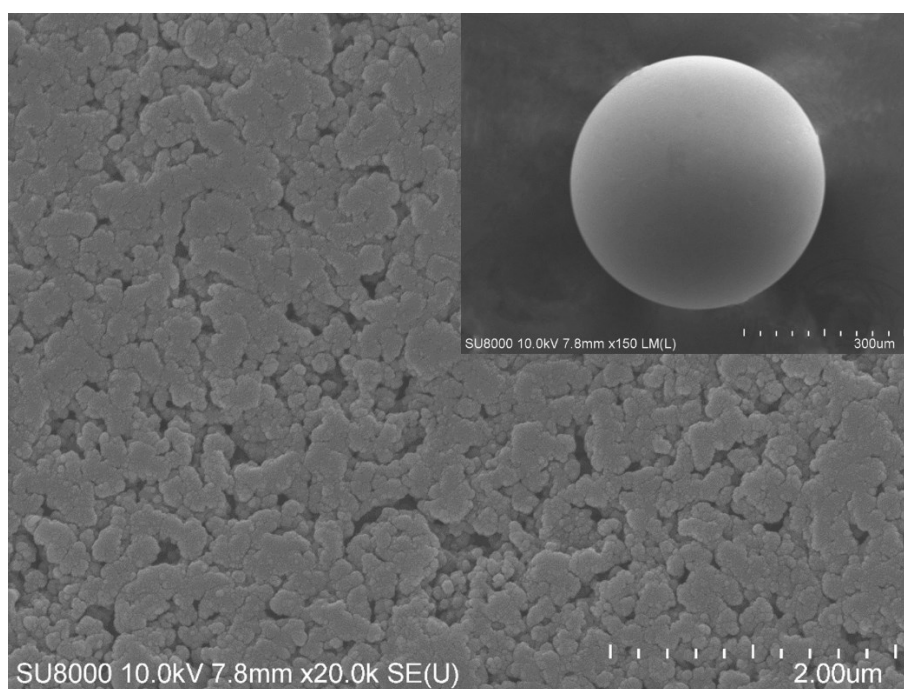

Fig. S15 FESEM image of of raw resin

Table S7 Pd/In mass loading on 0.5 g DOW M4195 Resin in the prepared M-Pd/In(1/0.5) after 5 cycles of reuse by regeneration

|                | Pd (mg) | In (mg) | Pd/In mass ratio | Pd + In (mg) |
|----------------|---------|---------|------------------|--------------|
| M-Pd/In(1/0.5) | 58.5    | 10.2    | 5.7/1            | 68.7         |

Table S8 The mass ratio of Pd to NO<sub>3</sub><sup>-</sup>-N, In to NO<sub>3</sub><sup>-</sup>-N, and Pd+In to NO<sub>3</sub><sup>-</sup>-N at different initial NO<sub>3</sub><sup>-</sup>-N concentration

| Initial NO <sub>3</sub> <sup>-</sup> -N (mg/L) | Initial NO <sub>3</sub> <sup>-</sup> -N (mg) | Mass ratio of Pd/NO <sub>3</sub> <sup>-</sup> -N | Mass ratio of In/NO <sub>3</sub> <sup>-</sup> -N | Mass ratio of Pd+In/NO <sub>3</sub> <sup>-</sup> -N |
|------------------------------------------------|----------------------------------------------|--------------------------------------------------|--------------------------------------------------|-----------------------------------------------------|
| 50                                             | 2.5                                          | 25.56                                            | 5.08                                             | 30.64                                               |
| 100                                            | 5.0                                          | 12.78                                            | 2.54                                             | 15.32                                               |
| 150                                            | 7.5                                          | 8.52                                             | 1.69                                             | 10.21                                               |
| 200                                            | 10.0                                         | 6.39                                             | 1.27                                             | 7.66                                                |
